# Supplementary material
Source: PubMed Central journal article supplement (PMC5895092)
Supplement: NIHMS954301-supplement-supplement.pdf [file NIHMS954301-supplement-supplement.pdf]

## Supplementary Appendix

This appendix has been provided by the authors to give readers additional information about their work.

Supplement to: Jourdain G, Ngo-Giang-Huong N, Harrison L, et al. Tenofovir versus placebo to prevent perinatal transmission of hepatitis B. *N Engl J Med* 2018;378:911-23. DOI: 10.1056/NEJMoa1708131

# Appendix

## Contents

|                                                                                                          |   |
|----------------------------------------------------------------------------------------------------------|---|
| List of investigators.....                                                                               | 2 |
| Checklist for added scrutiny for signs or conditions suggesting possible mitochondrial dysfunction ..... | 3 |
| Figure S1: Infant Growth over Time.....                                                                  | 4 |
| Table S1: Women with at least one Grade 3/4 Adverse Event (AE) or Serious Adverse Event (SAE) .....      | 5 |
| Table S2: Infants with at least one Grade 3/4 Adverse Event (AE) or Serious Adverse Event (SAE).....     | 6 |

## List of investigators

PHPT Coordinating Center: Mongkolwat P, Sukrakanchana P, and Chalermpanmetagul S (clinical coordinators), Tanasri S and Yoddee K (data managers), Than-in-at K (regulatory coordinator), Figoni J and Duclercq C (medical officers), clinical research assistants, and medical technologists.

Hospital sites (number of women enrolled): site investigators, co-investigator, study nurse, pharmacist, and medical technologist: Chiangrai Prachanukroh Hospital (57): Achalapong J, Chanta C, Utsaha S, Thaweasombat Y, Thongsuk P; Prapokkloa Hospital (32): Yuthavisuthi P, Ngampiyaskul C, Chanasit U, Greetanukroh P, Srisupaluk S; Banglamung Hospital (31): Kanjanavikai P, Phanomcheong S, Arunngamwong T, Sawatmarn S, Chaowachata R, Kaewsaweet W; Nopparat Rajathanee Hospital (29): Luvira A, Patamasingh Na Ayudhaya O, Poolpat P, Sangwichian (Pumapirat) W, Wattanagul N; Khon Kaen Hospital (23): Srirompotong U, Siriwachirachai T, Jearanaithanakit P, Sudsaard P, Wimonklang S; Bhumibol Adulyadej Hospital (19): Prommas S, Layangool P, Mekmullica J, Pengmark B, Thitathan M, Hajasturas J; Samutprakarn Hospital (19): Puangsombat A, Sabsanong P, Jenpoomjai N, Khwannual J, Kadkaew K; Nakornping Hospital (18): Limtrakul A, Suwannarat A, Naunkaew K, Namwong T, Chutima D, Yananuan P; Samutsakhon Hospital (17): Varadisai S, Krikajornkitti S, Raiva W, Luckanajantachote P, Sookbumrung Y; Chonburi Hospital (16): Chotivanich N, Bowonwatanuwong C, Hongsiriwon S, Argadamny L, Ekkomonrat D, Chaisiri K, Matchua S; Chiang Kham Hospital (14): Putiyanun C, Sathan S, Somjai N, Muangprom R; Phayao Provincial Hospital (13): Techakunakorn P, Jansook K, Palee N, Thungkham K; Lampang Hospital (13): Liamongsabuddhi P, Pongdetudom K, Leelaporn W, Thimmuang W, Sueakhamram W; Health Promotion Center Region 1 (12): Sangsawang S, Jittayanun K, Phanpong C, Supa W, Chittawikul T, Teeyakasem W; Lamphun Hospital (10): Matanasarawut W, Somsamai R, Charoenpong C, Wattananan C, Kitima K; Mae Chan Hospital (5): Buranabanjasatean S, Chaiwonglhek R, Suya S, Kheha P; Maharat Nakhon Ratchasima Hospital (3): Saereejittima A, Puernngooluerm P, Soontornmuang K, Sae-Eung K, Sidakarn S.

**Checklist for added scrutiny for signs or conditions suggesting possible mitochondrial dysfunction**

**Neurological Signs**

| <b>Major signs</b>                                                                    |                                                              |
|---------------------------------------------------------------------------------------|--------------------------------------------------------------|
| Non-febrile seizures, including neonatal seizures                                     | 1 <input type="checkbox"/> Yes 0 <input type="checkbox"/> No |
| Febrile seizures, either repeated ( $\geq 2$ episodes) or in children aged $< 6$ mths | 1 <input type="checkbox"/> Yes 0 <input type="checkbox"/> No |
| Peripheral neuropathy                                                                 | 1 <input type="checkbox"/> Yes 0 <input type="checkbox"/> No |
| Acquired microcephaly                                                                 | 1 <input type="checkbox"/> Yes 0 <input type="checkbox"/> No |
| Cranial nerves paresis                                                                | 1 <input type="checkbox"/> Yes 0 <input type="checkbox"/> No |
| Impaired cognitive development (for children older than 1 year)                       | 1 <input type="checkbox"/> Yes 0 <input type="checkbox"/> No |
| Cerebellar dysfunction and ataxia                                                     | 1 <input type="checkbox"/> Yes 0 <input type="checkbox"/> No |
| Motor disabilities, paraparesis, spasticity                                           | 1 <input type="checkbox"/> Yes 0 <input type="checkbox"/> No |
| Abnormalities on MRI or CT scan                                                       | 1 <input type="checkbox"/> Yes 0 <input type="checkbox"/> No |
| <b>Minor signs</b>                                                                    |                                                              |
| Febrile seizures                                                                      | 1 <input type="checkbox"/> Yes 0 <input type="checkbox"/> No |
| Isolated changes in muscular tone, hyper- and hypotonia                               | 1 <input type="checkbox"/> Yes 0 <input type="checkbox"/> No |
| Behavioral disturbances and hyperactivity disorder                                    | 1 <input type="checkbox"/> Yes 0 <input type="checkbox"/> No |
| Hypotonia, hypertonia                                                                 | 1 <input type="checkbox"/> Yes 0 <input type="checkbox"/> No |
| Moderate cognitive delay                                                              | 1 <input type="checkbox"/> Yes 0 <input type="checkbox"/> No |

**Other Organs**

| <b>Major signs</b>                             |                                                              |
|------------------------------------------------|--------------------------------------------------------------|
| Pancreatitis (including biological signs)      | 1 <input type="checkbox"/> Yes 0 <input type="checkbox"/> No |
| Cardiomyopathy                                 | 1 <input type="checkbox"/> Yes 0 <input type="checkbox"/> No |
| Myopathy                                       | 1 <input type="checkbox"/> Yes 0 <input type="checkbox"/> No |
| Decrease in visual acuity, retinopathy         | 1 <input type="checkbox"/> Yes 0 <input type="checkbox"/> No |
| Abnormal ocular motor function                 | 1 <input type="checkbox"/> Yes 0 <input type="checkbox"/> No |
| Nystagmus                                      | 1 <input type="checkbox"/> Yes 0 <input type="checkbox"/> No |
| Deafness                                       | 1 <input type="checkbox"/> Yes 0 <input type="checkbox"/> No |
| Unexplained death                              | 1 <input type="checkbox"/> Yes 0 <input type="checkbox"/> No |
| <b>Minor signs</b>                             |                                                              |
| Increase in transaminase levels*               | 1 <input type="checkbox"/> Yes 0 <input type="checkbox"/> No |
| Persistent anemia, neutropenia or thrombopenia | 1 <input type="checkbox"/> Yes 0 <input type="checkbox"/> No |
| Tubular defect                                 | 1 <input type="checkbox"/> Yes 0 <input type="checkbox"/> No |

**Figure S1: Infant Growth over Time**

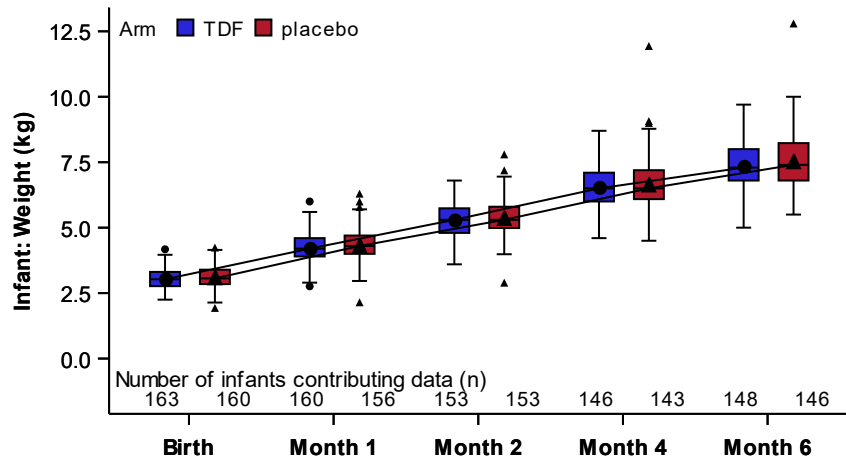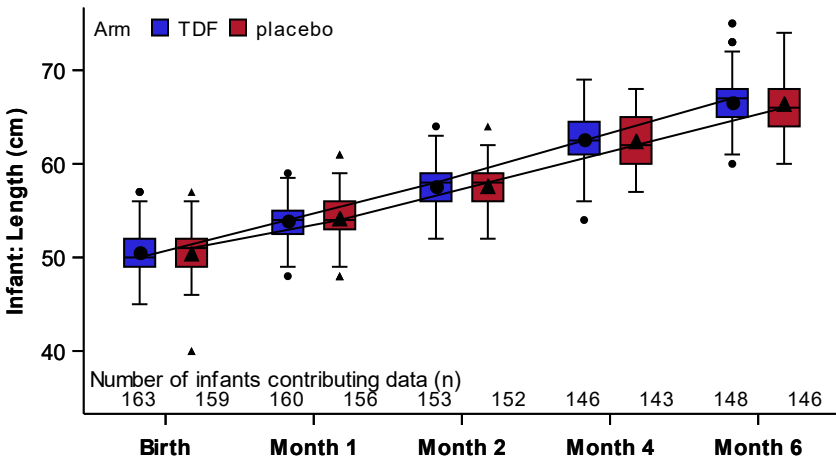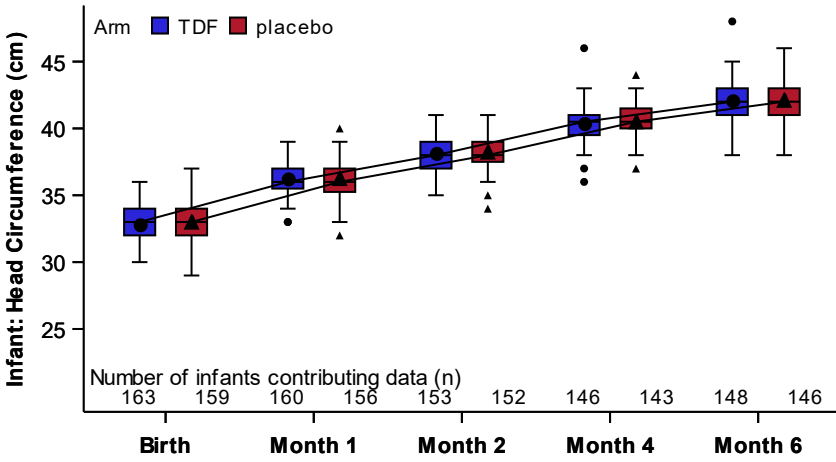

**Table S1: Women with at least one Grade 3/4 Adverse Event (AE) or Serious Adverse Event (SAE)**

| Grade 3/4 AE or SAE                                   | Randomized treatment |                 |                     |
|-------------------------------------------------------|----------------------|-----------------|---------------------|
|                                                       | TDF (N=168)          | placebo (N=163) | Total (N=331)       |
| <b>Any grade 3/4 AE or SAE</b>                        | <b>41 (24%)</b>      | <b>44 (27%)</b> | <b>85 (26%)</b>     |
| <b>Investigations</b>                                 | <b>32 (19%)</b>      | <b>26 (16%)</b> | <b>58 (18%)</b>     |
| Alanine aminotransferase increased                    | 31 (18%)             | 24 (15%)        | 55 (17%)            |
| Aspartate aminotransferase increased                  | 3 (2%)               | 2 (1%)          | 5 (2%)              |
| Blood phosphorus decreased                            | 1 (1%)               | 2 (1%)          | 3 (1%)              |
| <b>Pregnancy, puerperium and perinatal conditions</b> | <b>6 (4%)</b>        | <b>13 (8%)</b>  | <b>19 (6%)</b>      |
| Premature labor                                       | 2 (1%)               | 9 (6%)          | 11 (3%)             |
| Breech presentation                                   | 0 (0%)               | 1 (1%)          | 1 (<0.5%)           |
| Stillbirth                                            | 1 (1%)               | 0 (0%)          | 1 (<0.5%)           |
| Eclampsia                                             | 0 (0%)               | 1 (1%)          | 1 (<0.5%)           |
| Premature rupture of membranes                        | 1 (1%)               | 0 (0%)          | 1 (<0.5%)           |
| False labor                                           | 0 (0%)               | 1 (1%)          | 1 (<0.5%)           |
| Gestational hypertension                              | 1 (1%)               | 0 (0%)          | 1 (<0.5%)           |
| Complication of pregnancy                             | 0 (0%)               | 1 (1%)          | 1 (<0.5%)           |
| Postpartum hemorrhage                                 | 1 (1%)               | 0 (0%)          | 1 (<0.5%)           |
| Retained placenta or membranes                        | 1 (1%)               | 0 (0%)          | 1 (<0.5%)           |
| <b>Blood and lymphatic system disorders</b>           | <b>4 (2%)</b>        | <b>1 (1%)</b>   | <b>5 (2%)</b>       |
| Anemia                                                | 3 (2%)               | 1 (1%)          | 4 (1%)              |
| Lymphopenia                                           | 1 (1%)               | 0 (0%)          | 1 (<0.5%)           |
| <b>Infections and infestations</b>                    | <b>0 (0%)</b>        | <b>4 (2%)</b>   | <b>4 (1%)</b>       |
| Urinary tract infection                               | 0 (0%)               | 2 (1%)          | 2 (1%)              |
| Peritonitis                                           | 0 (0%)               | 1 (1%)          | 1 (<0.5%)           |
| Postoperative wound infection                         | 0 (0%)               | 1 (1%)          | 1 (<0.5%)           |
| Endometritis decidual                                 | 0 (0%)               | 1 (1%)          | 1 (<0.5%)           |
| <b>Injury, poisoning and procedural complications</b> | <b>1 (1%)</b>        | <b>1 (1%)</b>   | <b>2 (1%)</b>       |
| Wound dehiscence                                      | 0 (0%)               | 1 (1%)          | 1 (<0.5%)           |
| Injury                                                | 1 (1%)               | 0 (0%)          | 1 (<0.5%)           |
| <b>Reproductive system and breast disorders</b>       | <b>0 (0%)</b>        | <b>1 (1%)</b>   | <b>1 (&lt;0.5%)</b> |
| Uterine inflammation                                  | 0 (0%)               | 1 (1%)          | 1 (<0.5%)           |

TDF=tenofovir disoproxil fumarate

**Table S2: Infants with at least one Grade 3/4 Adverse Event (AE) or Serious Adverse Event (SAE)**

| Grade 3/4 AE or SAE                                         | Randomized treatment |                 |                     |
|-------------------------------------------------------------|----------------------|-----------------|---------------------|
|                                                             | TDF (N=161)          | placebo (N=160) | Total (N=321)       |
| <b>Any grade 3/4 AE or SAE</b>                              | <b>43 (27%)</b>      | <b>38 (24%)</b> | <b>81 (25%)</b>     |
| <b>Pregnancy, puerperium and perinatal conditions</b>       | <b>22 (14%)</b>      | <b>19 (12%)</b> | <b>41 (13%)</b>     |
| Jaundice neonatal                                           | 18 (11%)             | 16 (10%)        | 34 (11%)            |
| Low birth weight baby                                       | 4 (2%)               | 2 (1%)          | 6 (2%)              |
| Premature rupture of membranes                              | 0 (0%)               | 1 (1%)          | 1 (<0.5%)           |
| Premature baby                                              | 0 (0%)               | 1 (1%)          | 1 (<0.5%)           |
| <b>Infections and infestations</b>                          | <b>7 (4%)</b>        | <b>7 (4%)</b>   | <b>14 (4%)</b>      |
| Pneumonia                                                   | 3 (2%)               | 2 (1%)          | 5 (2%)              |
| Gastroenteritis                                             | 2 (1%)               | 2 (1%)          | 4 (1%)              |
| Respiratory tract infection                                 | 1 (1%)               | 1 (1%)          | 2 (1%)              |
| Sepsis                                                      | 0 (0%)               | 1 (1%)          | 1 (<0.5%)           |
| Omphalitis                                                  | 0 (0%)               | 1 (1%)          | 1 (<0.5%)           |
| Diarrhea infectious                                         | 1 (1%)               | 0 (0%)          | 1 (<0.5%)           |
| Upper respiratory tract infection                           | 1 (1%)               | 0 (0%)          | 1 (<0.5%)           |
| Bronchitis                                                  | 0 (0%)               | 1 (1%)          | 1 (<0.5%)           |
| <b>Respiratory, thoracic and mediastinal disorders</b>      | <b>3 (2%)</b>        | <b>6 (4%)</b>   | <b>9 (3%)</b>       |
| Neonatal asphyxia                                           | 2 (1%)               | 3 (2%)          | 5 (2%)              |
| Neonatal respiratory distress syndrome                      | 1 (1%)               | 1 (1%)          | 2 (1%)              |
| Meconium aspiration syndrome                                | 0 (0%)               | 1 (1%)          | 1 (<0.5%)           |
| Transient tachypnoea of the newborn                         | 0 (0%)               | 1 (1%)          | 1 (<0.5%)           |
| <b>Blood and lymphatic system disorders</b>                 | <b>4 (2%)</b>        | <b>4 (3%)</b>   | <b>8 (2%)</b>       |
| Leukocytosis                                                | 2 (1%)               | 4 (3%)          | 6 (2%)              |
| Anemia                                                      | 1 (1%)               | 0 (0%)          | 1 (<0.5%)           |
| Neutropenia                                                 | 1 (1%)               | 0 (0%)          | 1 (<0.5%)           |
| <b>Hepatobiliary disorders</b>                              | <b>6 (4%)</b>        | <b>1 (1%)</b>   | <b>7 (2%)</b>       |
| Hyperbilirubinemia neonatal                                 | 5 (3%)               | 0 (0%)          | 5 (2%)              |
| Jaundice                                                    | 1 (1%)               | 1 (1%)          | 2 (1%)              |
| <b>Investigations</b>                                       | <b>2 (1%)</b>        | <b>3 (2%)</b>   | <b>5 (2%)</b>       |
| Treponema test positive                                     | 1 (1%)               | 2 (1%)          | 3 (1%)              |
| Neutrophil count abnormal                                   | 0 (0%)               | 1 (1%)          | 1 (<0.5%)           |
| Alanine aminotransferase increased                          | 1 (1%)               | 0 (0%)          | 1 (<0.5%)           |
| <b>Congenital, familial and genetic disorders</b>           | <b>4 (2%)</b>        | <b>1 (1%)</b>   | <b>5 (2%)</b>       |
| Glucose-6-phosphate dehydrogenase deficiency                | 2 (1%)               | 0 (0%)          | 2 (1%)              |
| Congenital anomaly                                          | 1 (1%)               | 1 (1%)          | 2 (1%)              |
| Talipes                                                     | 1 (1%)               | 0 (0%)          | 1 (<0.5%)           |
| <b>General disorders and administration site conditions</b> | <b>1 (1%)</b>        | <b>2 (1%)</b>   | <b>3 (1%)</b>       |
| Pyrexia                                                     | 1 (1%)               | 2 (1%)          | 3 (1%)              |
| <b>Immune system disorders</b>                              | <b>0 (0%)</b>        | <b>1 (1%)</b>   | <b>1 (&lt;0.5%)</b> |
| Milk allergy                                                | 0 (0%)               | 1 (1%)          | 1 (<0.5%)           |
| <b>Metabolism and nutrition disorders</b>                   | <b>0 (0%)</b>        | <b>1 (1%)</b>   | <b>1 (&lt;0.5%)</b> |
| Hypoglycemia                                                | 0 (0%)               | 1 (1%)          | 1 (<0.5%)           |

TDF=tenofovir disoproxil fumarate, CI=confidence interval

Infants from multiple pregnancies are counted as one mother-infant(s) pair in the denominator, and all AEs in any infant are displayed.
